# Supplementary material for: Unveiling Distribution Patterns of Freshwater Phytoplankton by a Next Generation Sequencing Based Approach
Source: PLoS One. 2013 Jan 22;8(1):e53516. doi: 10.1371/journal.pone.0053516 (PMC3551911; doi:10.1371/journal.pone.0053516)
Supplement: Table S1 — Metadata of 259 lakes available to this study including 139 samples used in the analyses of this study. (XLS) [file pone.0053516.s001.xls]

## Sheet: Sheet1
#OTU ID	Lake	reads	OTUs	chao1_all	Depth	L_type	T	pH	O2	Alkalinity	Part_P	Tot_P	NO2_NO3	NH4	Total_N	BA	Chl_a	DOC	TP_DOC	Ret. Time	Longitude	Latitude
Abra0.1	Lake Abraxas	21614	472	951.613	2.5	ant	3	NA	11	NA	NA	4	NA	NA	260	NA	NA	4.7	NA	NA	78.29	-68.49
Abra1.1	Lake Abraxas	9024	149	274.125	2.5	ant	4	NA	11	NA	NA	NA	NA	NA	NA	NA	NA	NA	NA	NA	78.29	-68.49
Ace2.1	Ace Lake	18628	307	671.364	2.5	ant	1	NA	15	NA	NA	54	NA	NA	830	NA	NA	10	NA	NA	78.19	-68.47
AM060520	Alinen Mustajarvi	4178	245	420.906	e	H	10.4	5.4	8.3	NA	NA	NA	NA	NA	NA	8	6.2	12	NA	NA	25.1	61.2
AM061020	Alinen Mustajarvi	3580	284	484.735	e	H	7.7	5.4	6.8	NA	NA	NA	NA	NA	NA	6.9	6.8	11.1	NA	NA	25.1	61.2
AM070423	Alinen Mustajarvi	3175	455	769.5	e	H	4.7	5.3	8.9	0	36.8	17	40	165	652	1.6	10	11.1	1.53153	NA	25.1	61.2
AM070522	Alinen Mustajarvi	3941	261	359.02	e	H	10.8	5	8.7	0	79.2	15	20	30	465	1.5	15.4	10.7	1.40187	NA	25.1	61.2
AM070604	Alinen Mustajarvi	1927	162	436	e	H	12.5	5.1	8.4	0	34.4	11	17	23	393	0	5.7	10.4	1.05769	NA	25.1	61.2
AM070619	Alinen Mustajarvi	4027	254	305.872	e	H	12.1	5.1	6.1	0	89	10	11	34	378	2.3	5.7	10.2	0.980392	NA	25.1	61.2
AM070703	Alinen Mustajarvi	4235	156	295.045	e	H	14.5	5.1	6.8	0	98.7	11	11	22	383	3	5.8	10.5	1.04762	NA	25.1	61.2
AM070703_b	Alinen Mustajarvi	1862	120	213.714	e	H	14.5	5.1	6.8	0	98.7	11	11	22	383	3	5.8	10.5	1.04762	NA	25.1	61.2
AM070716	Alinen Mustajarvi	4393	245	303.812	e	H	15.7	5.1	6.6	0	101.3	11	6	13	384	2.7	6.1	10	1.1	NA	25.1	61.2
AM070731	Alinen Mustajarvi	1659	286	614.196	e	H	16.4	5.2	7	0	75.3	9	8	13	373	2.2	5	10	0.9	NA	25.1	61.2
AM070814	Alinen Mustajarvi	3698	214	234.685	e	H	18	5.1	5.5	0	84	7	22	13	383	6.1	4.5	9.4	0.744681	NA	25.1	61.2
AM070828	Alinen Mustajarvi	4207	336	806.154	e	H	15.8	5.2	5.9	0	45.6	8	9	18	379	3.1	4.4	9.2	0.869565	NA	25.1	61.2
AM070911	Alinen Mustajarvi	2113	312	626.894	e	H	NA	NA	NA	0	NA	NA	NA	NA	NA	NA	NA	9.8	NA	NA	25.1	61.2
AM070924	Alinen Mustajarvi	1759	203	301.341	e	H	9.8	5	7.3	0	39.1	14	9	19	364	1.8	5.2	9.6	1.45833	NA	25.1	61.2
AM071009	Alinen Mustajarvi	1583	149	286.391	e	H	11.7	5	7.7	0	16	8	15	23	390	1.5	3.8	9.3	0.860215	NA	25.1	61.2
AM071022	Alinen Mustajarvi	1903	227	276.875	e	H	5.1	5.4	6.1	NA	9.7	14	18	184	591	2.2	9.6	10	1.4	NA	25.1	61.2
AM080505	Alinen Mustajarvi	1725	201	323.484	e	H	8.5	4.9	5.9	0	138.6	26	33	68	571	3.1	10.6	9.7	2.68041	NA	25.1	61.2
AM080520	Alinen Mustajarvi	1919	174	344.167	e	H	8.1	5	8.5	0	81.7	17	18	15	443	4.7	0	11.5	1.47826	NA	25.1	61.2
AM080603	Alinen Mustajarvi	1688	129	231.143	e	H	12.3	4.9	6.6	0	59	12	10	10	381	1.1	6.5	11	1.09091	NA	25.1	61.2
AM080617	Alinen Mustajarvi	1611	98	245.333	e	H	13.1	5	6.2	0	34.7	10	12	15	386	4.7	0	11.5	0.869565	NA	25.1	61.2
AM080701	Alinen Mustajarvi	1844	103	167.5	e	H	15.5	4.9	5.4	0	55.5	10	19	13	373	6.2	1.7	12.6	0.793651	NA	25.1	61.2
AM080715	Alinen Mustajarvi	1615	153	272.435	e	H	16.1	5	5	0	51.5	11	22	11	385	3.1	0	11.3	0.973451	NA	25.1	61.2
AM080715_b	Alinen Mustajarvi	2454	178	360.4	e	H	16.1	5	5	0	51.5	11	22	11	385	3.1	0	11.3	0.973451	NA	25.1	61.2
AM080729	Alinen Mustajarvi	1783	85	154	e	H	16.8	5	4.9	0	61.3	11	18	6	409	0	3.4	12.7	0.866142	NA	25.1	61.2
AM080812	Alinen Mustajarvi	1635	128	379.273	e	H	15.8	4.9	6	0	70.6	12	6	7	425	2.9	0	12	1	NA	25.1	61.2
AM080826	Alinen Mustajarvi	673	72	116	e	H	15.5	4.9	5.2	0	23.1	8	12	4	359	2.4	4.1	12.2	0.655738	NA	25.1	61.2
AM080910	Alinen Mustajarvi	1861	201	466.435	e	H	5.9	4.9	6.2	-0.014	28.3	11	15	15	411	NA	NA	10.8	1.01852	NA	25.1	61.2
AM080923	Alinen Mustajarvi	1894	214	412.042	e	H	9.3	4.8	6.1	0	35.1	11	13	9	390	0.8	7.2	11.2	0.982143	NA	25.1	61.2
AM081007	Alinen Mustajarvi	1899	181	284.529	e	H	NA	NA	NA	0	NA	NA	NA	NA	NA	NA	NA	11.3	NA	NA	25.1	61.2
AM081029	Alinen Mustajarvi	1796	219	406.286	e	H	6	5.2	6.6	-0.008	24.3	11	31	38	457	3.8	12	12	0.916667	NA	25.1	61.2
AM081119	Alinen Mustajarvi	1719	247	521.091	e	H	4.4	5.1	7.7	NA	8.6	13.5	24	142	553.5	0.6	0	12.8	1.05469	NA	25.1	61.2
AM090311	Alinen Mustajarvi	2380	194	484.714	e	H	2.2	5.1	4.3	-0.015	4.35	16	57	174	650	1.4	2.4	12.9	1.24031	NA	25.1	61.2
AM090505	Alinen Mustajarvi	1847	138	295.929	e	H	7	4.9	3.6	-0.025	0.1	15	57	110	518	3.1	5.4	10.6	1.41509	NA	25.1	61.2
AM090519	Alinen Mustajarvi	1733	128	199.55	e	H	12.2	4.8	7.9	-0.007	117.6	13	19	40	452	0.6	6.1	11.8	1.10169	NA	25.1	61.2
AM090616	Alinen Mustajarvi	2707	158	333.048	e	H	14.3	4.7	7.5	-0.018	33.9	12	14	15	344	0.8	3.4	12.7	0.944882	NA	25.1	61.2
AM090714	Alinen Mustajarvi	1723	101	226.273	e	H	17.2	4.8	6.5	-0.03	52.3	15	29	25	339	0.8	2.9	14	1.07143	NA	25.1	61.2
AM090818	Alinen Mustajarvi	2758	127	222.056	e	H	16.3	5.1	8.5	-0.019	110	14	15	8	412	1	7.2	11.4	1.22807	NA	25.1	61.2
AM090915	Alinen Mustajarvi	2146	211	333	e	H	13	4.9	7.6	-0.031	145.6	17	17	17	442	1.2	19.3	12.2	1.39344	NA	25.1	61.2
AM091020	Alinen Mustajarvi	2473	323	576.5	e	H	3.8	5.2	4.9	-0.001	56.5	16	21	90	559	2.1	14.7	13.2	1.21212	NA	25.1	61.2
AM091215	Alinen Mustajarvi	1923	195	338.676	e	H	2.6	5.3	7.7	-0.001	NA	16	51	22	540	0.8	40.4	12.7	1.25984	NA	25.1	61.2
AM100406	Alinen Mustajarvi	1865	232	439.237	e	H	0.9	4.8	4.9	NA	NA	12	87	121	549	1	2.1	11	1.09091	NA	25.1	61.2
AM100503	Alinen Mustajarvi	1419	268	690.973	e	H	5.4	5	5.7	0	124.9	13	29	25	452	0.9	13.4	11.2	1.16071	NA	25.1	61.2
AM100622	Alinen Mustajarvi	2200	154	378.176	e	H	15.7	5	6.8	0	156.8	11	12	9	363	1.3	3.2	10.5	1.04762	NA	25.1	61.2
AM100825	Alinen Mustajarvi	1993	207	348.927	e	H	16.9	5	7.9	0	82.9	12	15	11	403	1.4	7.9	10	1.2	NA	25.1	61.2
Uw8	Alstasjon	3144	527	436.836	3	e	20	NA	NA	NA	NA	92.4262	NA	NA	1170.38	5.09464	NA	15.4954	5.96475	0.0164384	17.2667	59.75
T0L2a	Aresjon	1617	212	464.217	NA	o	18.3	7.25	NA	NA	NA	5.3	NA	NA	0.42	NA	NA	2.9	1.82759	NA	13.08	63.3833
T0L2b	Aresjon	1054	154	289	NA	o	18.3	7.25	NA	NA	NA	5.3	NA	NA	0.42	NA	NA	2.9	1.82759	NA	13.08	63.3833
At	Atvandtjarnen	31835	2542	6350.42	e	o	8.9	NA	9.17	NA	NA	9.28433	13.0824	10.5871	441.698	2.87206	NA	8.644	1.07408	0.441096	12.6	63.5
BS	Bodsjon	30666	1729	3813.11	e	o	9.5	NA	10.4	NA	NA	3.86847	15.2469	4.4514	81.4279	1.42482	NA	2.065	1.87335	0.0520548	12.6	63.5
Uw3	Bredsjon	17109	1999	2787.01	1.5	M	19.2	NA	8.56	NA	NA	36.2003	NA	NA	1072.07	3.50748	NA	21.8199	1.65905	0.986301	17.1667	59.9
Bt	Bustadtjarnen	31330	1748	4422.26	e	o	9.3	NA	9.11	NA	NA	6.76983	10.9134	1.564	279.689	1.82185	NA	9.785	0.691858	0.558904	12.3	63.56
Crook2.1	Crooked Lake	18985	276	524.207	2.5	ant	0	NA	13	NA	NA	2	NA	NA	30	NA	NA	0.6	NA	NA	78.19	-68.62
Dig	Digernastjarnen	31333	1242	2518.67	e	o	11.3389	NA	9.44333	NA	NA	5.80271	8.7398	1.564	133.893	1.41522	NA	4.84	1.19891	0.512329	12.7	63.6
Druzh1.1	Lake Druzhby	5671	246	496.345	2.5	ant	4	NA	17	NA	NA	2	NA	NA	80	NA	NA	1.1	NA	NA	78.31	-68.6
Erken20080220	Erken	2819	188	403	0-1 m	M	0.5	8.07	14.2443	1.57749	9.31034	23	1	9	527	5.07	14.9657	NA	NA	7	18.56	59.84
Erken20080302	Erken	2853	182	287.333	0-1 m	M	1.5	NA	NA	NA	NA	NA	NA	NA	NA	NA	20.8884	NA	NA	7	18.56	59.84
Erken20080305	Erken	3233	226	369.083	0-20m	M	1.5	7.98	14.1336	1.82263	13.5172	25	11	10	543	6.29	20.2817	NA	NA	7	18.56	59.84
Erken20080312	Erken	2104	194	341	0-20m	M	1.8	8.13	14.0805	1.66095	12.6897	25	0.2	8	573	7.02	17.0552	NA	NA	7	18.56	59.84
Erken20080318	Erken	2389	166	253.324	0-20m	M	1.4	7.95	14.0454	1.73139	13.2414	24	1	4	571	8.12	17.5572	NA	NA	7	18.56	59.84
Erken20080409	Erken	2164	161	235.966	0-20m	M	3.7	7.91	12.4558	1.71497	7.65517	19	0.2	3	558	7.78	3.79859	NA	NA	7	18.56	59.84
Erken20080414	Erken	1994	176	299.917	20	M	3.8	8.01	11.0577	1.67974	8.13793	19	0.2	5	590	6.42	5.64929	NA	NA	7	18.56	59.84
Erken20080422	Erken	4067	256	420.683	20	M	5	NA	11.2567	NA	NA	40	NA	NA	578	7.78	3.88337	NA	NA	7	18.56	59.84
Erken20080528	Erken	1406	233	333.857	20	M	11.2	8.12	8.8561	1.78731	4.27586	19	9	10	606	6.62	1.3817	NA	NA	7	18.56	59.84
Erken20080603	Erken	2403	179	222.676	6.5	M	16	8.05	9.6556	1.72462	6.75862	15	0.2	1	604	7.54	1.35017	NA	NA	7	18.56	59.84
Erken20080611	Erken	3176	200	290.844	8	M	17.7	7.9	9.9296	1.57279	7.03448	16	1	8	655	9.18	1.24026	NA	NA	7	18.56	59.84
Erken20080624	Erken	2584	220	362.182	14	M	16.8	7.94	8.433	1.79093	6.89655	28	0.2	9	616	13	2.06254	NA	NA	7	18.56	59.84
Erken20080701	Erken	2570	218	377.241	14	M	17	8.06	8.6204	1.8688	7.03448	21	1	7	550	13	2.49436	NA	NA	7	18.56	59.84
Erken20080707	Erken	2380	179	250.667	8	M	18	8.17	8.721	1.6943	4.62069	15	0.2	6	509	12.6	1.91294	NA	NA	7	18.56	59.84
Erken20080714	Erken	2308	169	261.125	10	M	19	8.16	9.1001	1.6808	12.4828	26	2	11	959	14.9	11.3365	NA	NA	7	18.56	59.84
Erken20080721	Erken	1885	192	292.885	12	M	19	7.98	8.4694	1.6549	9.93103	25	5	17	719	15.3	8.98733	NA	NA	7	18.56	59.84
Erken20080731	Erken	1636	196	273.028	6.5	M	21.2	8.5	9.3744	1.74774	11.7931	37	5	22	1222	14.4	7.23006	NA	NA	7	18.56	59.84
Erken20080806	Erken	1717	250	457.5	14	M	18.9	7.92	7.24404	1.75055	11.1724	33	22	41	834	13.1	4.19276	NA	NA	7	18.56	59.84
Erken20080812	Erken	1770	270	474.154	14	M	18.8	8.01	8.09098	1.77311	13.5172	30	31	24	717	NA	7.7283	NA	NA	7	18.56	59.84
Erken20080819	Erken	1738	236	370.732	20	M	18.3	7.91	8.1079	1.7407	13.931	34	20	41	924	12.1	9.09533	NA	NA	7	18.56	59.84
Erken20080826	Erken	1761	226	325.128	20	M	17.9	8.04	8.6292	1.60339	12.6897	37	3	8	751	10.9	10.8164	NA	NA	7	18.56	59.84
Erken20080902	Erken	1616	219	363.588	20	M	17	8.18	8.9952	1.71307	20.6207	35	0.2	5	667	9.81	11.6007	NA	NA	7	18.56	59.84
Erken20080910	Erken	1718	218	392.129	20	M	16	7.96	9.082	1.80128	10.6897	31	2	8	698	9.55	8.39546	NA	NA	7	18.56	59.84
Erken20080916	Erken	1982	225	442.207	20	M	14.6	8.07	8.6856	1.71307	11.4483	41	2	8	627	8.49	9.11577	NA	NA	7	18.56	59.84
Erken20080924	Erken	2733	256	429.467	20	M	13.6	8	8.072	1.77311	7.51724	40	3	10	689	9.74	4.35432	NA	NA	7	18.56	59.84
Erken20081001	Erken	2338	216	302.024	20	M	12.8	7.98	9.3932	1.70114	6.75862	42	2	0.1	614	7.77	2.23898	NA	NA	7	18.56	59.84
Erken20081007	Erken	1292	211	417.517	20	M	11.8	7.95	8.7612	1.73371	5.93103	45	9	16	658	9.46	2.15803	NA	NA	7	18.56	59.84
Erken20081014	Erken	1378	245	435.024	20	M	11.1	7.96	9.4963	1.78026	7.93103	47	16	33	778	8.78	2.17976	NA	NA	7	18.56	59.84
Erken20081029	Erken	2374	298	574.65	20	M	8.6	7.96	10.0837	1.77683	4.75862	40	30	39	667	7.92	1.63236	NA	NA	7	18.56	59.84
Erken20081108	Erken	1605	290	564.857	20	M	2.8	7.86	11.0925	1.5761	4.2069	36	86	30	991	7.24	0.995749	NA	NA	7	18.56	59.84
Erken20081215	Erken	1699	260	525.583	20	M	2.3	7.84	11.8008	1.6808	3.86207	27	110	19	753	7.54	0.784204	NA	NA	7	18.56	59.84
Erken20090112_a	Erken	846	160	209.55	2	M	NA	NA	NA	NA	NA	NA	NA	NA	NA	NA	NA	NA	NA	7	18.56	59.84
Erken20090113	Erken	431	114	531.812	20	M	0.75	9.07	11.1041	1.66752	2.55172	37	194	6	925	6.6	0.552591	NA	NA	7	18.56	59.84
Erken20090326_a	Erken	910	185	298.176	1	M	NA	NA	NA	NA	NA	NA	NA	NA	NA	NA	NA	NA	NA	7	18.56	59.84
Erken20090402_a	Erken	1936	299	221	2	M	NA	NA	NA	NA	NA	NA	NA	NA	NA	NA	NA	NA	NA	7	18.56	59.84
Erken20090402_b	Erken	925	181	94.0667	2	M	NA	NA	NA	NA	NA	NA	NA	NA	NA	NA	NA	NA	NA	7	18.56	59.84
Erken20090406_a	Erken	692	128	180.545	1	M	NA	NA	NA	NA	NA	NA	NA	NA	NA	NA	NA	NA	NA	7	18.56	59.84
Erken20090414_a	Erken	176	63	186	1	M	NA	NA	NA	NA	NA	NA	NA	NA	NA	NA	NA	NA	NA	7	18.56	59.84
Erken20090414_b	Erken	290	78	141.909	2	M	NA	NA	NA	NA	NA	NA	NA	NA	NA	NA	NA	NA	NA	7	18.56	59.84
Erken20090417_a	Erken	337	100	361.667	1	M	NA	NA	NA	NA	NA	NA	NA	NA	NA	NA	NA	NA	NA	7	18.56	59.84
Erken20090417_b	Erken	316	71	331.231	2	M	NA	NA	NA	NA	NA	NA	NA	NA	NA	NA	NA	NA	NA	7	18.56	59.84
Erken20090420_a	Erken	960	179	251.533	1	M	NA	NA	NA	NA	NA	NA	NA	NA	NA	NA	NA	NA	NA	7	18.56	59.84
Erken20090420_b	Erken	947	179	296	2	M	NA	NA	NA	NA	NA	NA	NA	NA	NA	NA	NA	NA	NA	7	18.56	59.84
Erken20090420_c	Erken	765	151	275.935	1	M	NA	NA	NA	NA	NA	NA	NA	NA	NA	NA	NA	NA	NA	7	18.56	59.84
Erken20090422_a	Erken	1065	171	462.536	1	M	NA	NA	NA	NA	NA	NA	NA	NA	NA	NA	NA	NA	NA	7	18.56	59.84
Erken20090422_b	Erken	1059	170	281	2	M	NA	NA	NA	NA	NA	NA	NA	NA	NA	NA	NA	NA	NA	7	18.56	59.84
Erken20090424_a	Erken	1354	214	312.536	1	M	NA	NA	NA	NA	NA	NA	NA	NA	NA	NA	NA	NA	NA	7	18.56	59.84
Erken20090424_b	Erken	676	134	230.833	2	M	NA	NA	NA	NA	NA	NA	NA	NA	NA	NA	NA	NA	NA	7	18.56	59.84
Erken20090427_a	Erken	1284	178	196.5	1	M	NA	NA	NA	NA	NA	NA	NA	NA	NA	NA	NA	NA	NA	7	18.56	59.84
Erken20090427_b	Erken	810	145	242.129	2	M	NA	NA	NA	NA	NA	NA	NA	NA	NA	NA	NA	NA	NA	7	18.56	59.84
Erken20090429_a	Erken	429	108	272.25	1	M	NA	NA	NA	NA	NA	NA	NA	NA	NA	NA	NA	NA	NA	7	18.56	59.84
Erken20090429_b	Erken	878	151	363	2	M	NA	NA	NA	NA	NA	NA	NA	NA	NA	NA	NA	NA	NA	7	18.56	59.84
Erken20090504_a	Erken	939	163	271.773	1	M	NA	NA	NA	NA	NA	NA	NA	NA	NA	NA	NA	NA	NA	7	18.56	59.84
Erken20090504_b	Erken	1227	185	314.391	2	M	NA	NA	NA	NA	NA	NA	NA	NA	NA	NA	NA	NA	NA	7	18.56	59.84
Erken20090506_a	Erken	1021	164	297.316	1	M	NA	NA	NA	NA	NA	NA	NA	NA	NA	NA	NA	NA	NA	7	18.56	59.84
Erken20090506_b	Erken	1134	175	280.857	2	M	NA	NA	NA	NA	NA	NA	NA	NA	NA	NA	NA	NA	NA	7	18.56	59.84
Erken20090508_a	Erken	908	156	443	1	M	NA	NA	NA	NA	NA	NA	NA	NA	NA	NA	NA	NA	NA	7	18.56	59.84
Erken20090508_b	Erken	880	171	234.5	2	M	NA	NA	NA	NA	NA	NA	NA	NA	NA	NA	NA	NA	NA	7	18.56	59.84
Erken20090511_a	Erken	995	168	269.25	1	M	NA	NA	NA	NA	NA	NA	NA	NA	NA	NA	NA	NA	NA	7	18.56	59.84
Erken20090511_b	Erken	783	150	373.533	1	M	NA	NA	NA	NA	NA	NA	NA	NA	NA	NA	NA	NA	NA	7	18.56	59.84
Erken20090513_a	Erken	981	193	325.647	1	M	NA	NA	NA	NA	NA	NA	NA	NA	NA	NA	NA	NA	NA	7	18.56	59.84
Erken20090515_a	Erken	857	156	480.357	1	M	NA	NA	NA	NA	NA	NA	NA	NA	NA	NA	NA	NA	NA	7	18.56	59.84
Erken20090515_b	Erken	2012	259	427.875	2	M	NA	NA	NA	NA	NA	NA	NA	NA	NA	NA	NA	NA	NA	7	18.56	59.84
Erken20090520_a	Erken	1030	194	196.107	1	M	NA	NA	NA	NA	NA	NA	NA	NA	NA	NA	NA	NA	NA	7	18.56	59.84
Erken20090520_b	Erken	827	134	308.323	2	M	NA	NA	NA	NA	NA	NA	NA	NA	NA	NA	NA	NA	NA	7	18.56	59.84
Erken20090525_a	Erken	1317	177	356.692	1	M	NA	NA	NA	NA	NA	NA	NA	NA	NA	NA	NA	NA	NA	7	18.56	59.84
Erken20090525_b	Erken	1346	221	387.25	2	M	NA	NA	NA	NA	NA	NA	NA	NA	NA	NA	NA	NA	NA	7	18.56	59.84
Erken20090529_a	Erken	906	166	235	1	M	NA	NA	NA	NA	NA	NA	NA	NA	NA	NA	NA	NA	NA	7	18.56	59.84
Erken20090529_b	Erken	753	166	318.292	2	M	NA	NA	NA	NA	NA	NA	NA	NA	NA	NA	NA	NA	NA	7	18.56	59.84
Erken20090601_a	Erken	999	196	378.357	2	M	NA	NA	NA	NA	NA	NA	NA	NA	NA	NA	NA	NA	NA	7	18.56	59.84
Erken20090601_b	Erken	771	137	209.333	1	M	NA	NA	NA	NA	NA	NA	NA	NA	NA	NA	NA	NA	NA	7	18.56	59.84
Uw5	Fibysjon	2610	514	655.722	1.5	M	17.95	NA	8.29	NA	NA	31.8357	NA	NA	1293.26	3.49258	NA	31.0374	1.02572	0.134247	17.3667	59.9
Uw9	Funbosjon	15612	1508	1707.81	1.5	e	19.3	NA	6.88	NA	NA	45.1861	NA	NA	1018	5.2428	NA	23.1094	1.95531	0.312329	17.85	59.8667
Gt	Gravatjarnen	32116	2439	6129.25	e	o	8.5	NA	9.625	NA	NA	9.8646	21.7129	3.0077	318.45	2.10682	NA	10.045	0.982041	0.375342	12.3	63.6
Hag	Haggsjon	30391	936	1640.78	e	o	12.3	NA	9.70343	NA	NA	3.09478	32.3987	3.36862	126.057	1.14498	NA	4.364	0.709161	2.0274	12.71	63.51
Hal	Hallastjarnen	30334	1326	2912.01	e	o	10.5	NA	9.31083	NA	NA	7.73694	13.0824	6.25602	266.724	2.5903	NA	5.834	1.32618	1.98082	12.63	63.48
Hand2.1	Lake Hand	7641	266	585.758	2.5	ant	0	0	18	NA	NA	5	NA	NA	340	NA	NA	4.4	NA	NA	78.31	-68.55
T0L3a	Hassellasjon	1760	357	720.887	NA	H	19.5	7.09	NA	NA	NA	12.7	NA	NA	0.4	NA	NA	8.68	1.46313	NA	16.8	62.0833
T0L3b	Hassellasjon	728	210	420.154	NA	H	19.5	7.09	NA	NA	NA	12.7	NA	NA	0.4	NA	NA	8.68	1.46313	NA	16.8	62.0833
Hes	Hensjon	31348	963	1611.17	e	o	11.5	NA	9.63333	NA	NA	2.90135	9.82715	3.36862	78.811	1.18853	NA	3.606	0.804591	2.0274	13	63.3
High1.1	Highway Lake	7846	191	317.217	2.5	ant	2	0	14	NA	NA	8	NA	NA	570	NA	NA	5.7	NA	NA	78.22	-68.46
Hol	Holmtjarnen	30564	1025	2005.59	e	o	10.8333	NA	9.65222	NA	NA	3.82166	6.56168	1.92493	91.957	1.08095	NA	4.935	0.774398	2.38082	12.6	63.6
LBS	Lang-Bjorsjon	25213	1556	3003.05	e	o	9.3	NA	9.75	NA	NA	7.54352	6.56168	-0.240616	269.329	2.31174	NA	6.61	1.14123	0.249315	12.27	63.59
Uw15	Langsjon	2586	401	443.029	5.5	M	17.8	NA	10.48	NA	NA	13.6072	NA	NA	853.327	2.8893	NA	7.8789	1.72704	3 to 8	17.5833	60.05
T0L1a	Lille Jonsvatn	666	133	288.4	NA	o	18	7.55	NA	NA	NA	4	NA	NA	0.38	NA	NA	3.29	1.21581	NA	10.6167	63.3667
T0L1b	Lille Jonsvatn	2315	245	409.458	NA	o	18	7.55	NA	NA	NA	4	NA	NA	0.38	NA	NA	3.29	1.21581	NA	10.6167	63.3667
Uw11	Lotsjon	2922	346	378.241	9	M	18.2	NA	6.92	NA	NA	31.5789	NA	NA	656.707	3.51206	NA	13.0184	2.42572	4.4	17.95	59.8667
Uw2	Lumpen	2857	536	720.442	1.5	M	17.5	NA	6.48	NA	NA	43.1322	NA	NA	1364.54	3.03116	NA	30.5324	1.41267	0.449315	17.2833	59.9667
Mar0.1	Marine Coastal site	8025	313	710.317	2.5	ant	3	NA	13	NA	NA	NA	NA	NA	NA	NA	NA	NA	NA	NA	77.9	-68.58
McNeil1.5.1	Lake McNeil	10136	223	493.933	2.5	ant	3	NA	NA	NA	NA	NA	NA	NA	NA	NA	NA	NA	NA	NA	78.36	-68.53
McNeill.0.1	Lake McNeil	10579	267	684.688	2.5	ant	3	NA	NA	NA	NA	NA	NA	NA	NA	NA	0.2	NA	NA	NA	78.36	-68.53
MS	Medstugusjon	31242	1097	1864.25	e	o	11.3	NA	9.64	NA	NA	3.48162	17.4068	2.28585	118.197	1.38064	NA	2.506	1.38932	0.821918	12.35	63.55
mj_e_a	Mekkojarvi	1734	73	103.333	0-0.6	H	7.5	5.99	4.8	0.184	NA	27	NA	NA	786	8.8	12.9	17.6	NA	NA	25.1333	61.2167
mj_e_s	Mekkojarvi	2119	789	1793.74	0-0.6	H	9	5.97	8.3	0.225	NA	17	NA	NA	419	6.6	11.3	26.3	NA	NA	25.1333	61.2167
n_e_a	Nimeton	1968	337	1166.66	0-2	H	7.5	5.43	4.9	0.057	NA	32	NA	NA	858	5.4	7.5	22.3	NA	NA	25.1667	61.2167
n_e_s	Nimeton	1970	438	1242.05	0-2	H	6.5	5.62	5.2	0.09	NA	27	NA	NA	828	1.6	8.5	22.3	NA	NA	25.1667	61.2167
Uw13	Norrsjon	3446	493	397.651	2	e	18.8	NA	4.16	NA	NA	57.2529	NA	NA	1379.29	5.41037	NA	28.9584	1.97707	0.109589	17.9	59.8667
Orga2.1	Organic Lake	24734	262	506.459	2.5	ant	1	NA	10	NA	NA	212	NA	NA	8000	NA	NA	64	NA	NA	78.19	-68.46
Orga3.1	Organic Lake	9485	200	368.889	2.5	ant	-2	NA	NA	NA	NA	NA	NA	NA	NA	NA	NA	NA	NA	NA	78.19	-68.46
ON	Oster-Noren	30853	917	1898.83	e	o	13.3357	NA	9.53571	NA	NA	2.86624	6.56168	2.28585	52.5032	1.84747	NA	2.002	1.43169	0.0849315	12.77	63.44
Uw12	Ovre Langsjon	14967	1541	1824.31	7	e	16.7	NA	3.4	NA	NA	51.6046	NA	NA	1298.18	5.65296	NA	27.9879	1.84382	0.0657534	18.0167	59.8667
Pend0.2	Pendant Lake	23410	321	747.757	2.5	ant	1	NA	NA	NA	9	NA	NA	NA	180	NA	NA	18	NA	NA	78.24	-68.46
Pend1.5.1	Pendant Lake	13138	266	539.561	2.5	ant	1	NA	NA	NA	29	NA	NA	NA	600	NA	NA	4.4	NA	NA	78.24	-68.46
Uw10	Ramsen	1997	338	304	6	M	16.5	NA	6.87	NA	NA	21.3094	NA	NA	678.827	2.82162	NA	22.1139	0.963619	1.11233	17.8667	59.8
Uw4	Ramsjon	3016	371	298.029	2.5	M	20	NA	NA	NA	NA	34.9166	NA	NA	1126.14	3.29595	NA	28.3684	1.23083	0.320548	17.2	59.8333
Rimov20090304_a	Rimov	5049	334	617.167	1	M	NA	NA	NA	NA	NA	NA	NA	NA	NA	NA	NA	NA	NA	0.273	14.47	48.83
Rimov20090323_a	Rimov	822	243	541	1	M	NA	NA	NA	NA	NA	NA	NA	NA	NA	NA	NA	NA	NA	0.273	14.47	48.83
Rimov20090323_b	Rimov	843	267	558.116	2	M	NA	NA	NA	NA	NA	NA	NA	NA	NA	NA	NA	NA	NA	0.273	14.47	48.83
Rimov20090323_c	Rimov	967	271	581.837	2	M	NA	NA	NA	NA	NA	NA	NA	NA	NA	NA	NA	NA	NA	0.273	14.47	48.83
Rimov20090330_a	Rimov	887	286	600.023	1	M	NA	NA	NA	NA	NA	NA	NA	NA	NA	NA	NA	NA	NA	0.273	14.47	48.83
Rimov20090330_b	Rimov	1195	360	970.738	2	M	NA	NA	NA	NA	NA	NA	NA	NA	NA	NA	NA	NA	NA	0.273	14.47	48.83
Rimov20090403_a	Rimov	1382	359	703.103	1	M	NA	NA	NA	NA	NA	NA	NA	NA	NA	NA	NA	NA	NA	0.273	14.47	48.83
Rimov20090403_b	Rimov	402	172	373.833	2	M	NA	NA	NA	NA	NA	NA	NA	NA	NA	NA	NA	NA	NA	0.273	14.47	48.83
Rimov20090406_a	Rimov	1422	433	1201.12	1	M	NA	NA	NA	NA	NA	NA	NA	NA	NA	NA	NA	NA	NA	0.273	14.47	48.83
Rimov20090406_b	Rimov	1444	445	1246.2	2	M	NA	NA	NA	NA	NA	NA	NA	NA	NA	NA	NA	NA	NA	0.273	14.47	48.83
Rimov20090408_a	Rimov	1836	490	1565.58	1	M	NA	NA	NA	NA	NA	NA	NA	NA	NA	NA	NA	NA	NA	0.273	14.47	48.83
Rimov20090408_b	Rimov	1524	397	846.478	2	M	NA	NA	NA	NA	NA	NA	NA	NA	NA	NA	NA	NA	NA	0.273	14.47	48.83
Rimov20090410_a	Rimov	878	254	542.163	1	M	NA	NA	NA	NA	NA	NA	NA	NA	NA	NA	NA	NA	NA	0.273	14.47	48.83
Rimov20090410_b	Rimov	1205	349	822.833	2	M	NA	NA	NA	NA	NA	NA	NA	NA	NA	NA	NA	NA	NA	0.273	14.47	48.83
Rimov20090413_a	Rimov	672	174	343.889	1	M	NA	NA	NA	NA	NA	NA	NA	NA	NA	NA	NA	NA	NA	0.273	14.47	48.83
Rimov20090413_b	Rimov	1279	302	741.317	2	M	NA	NA	NA	NA	NA	NA	NA	NA	NA	NA	NA	NA	NA	0.273	14.47	48.83
Rimov20090415_a	Rimov	327	121	279.053	2	M	NA	NA	NA	NA	NA	NA	NA	NA	NA	NA	NA	NA	NA	0.273	14.47	48.83
Rimov20090415_b	Rimov	1285	256	456	1	M	NA	NA	NA	NA	NA	NA	NA	NA	NA	NA	NA	NA	NA	0.273	14.47	48.83
Rimov20090417_a	Rimov	845	203	395.441	1	M	NA	NA	NA	NA	NA	NA	NA	NA	NA	NA	NA	NA	NA	0.273	14.47	48.83
Rimov20090417_b	Rimov	948	210	449.848	2	M	NA	NA	NA	NA	NA	NA	NA	NA	NA	NA	NA	NA	NA	0.273	14.47	48.83
Rimov20090420_a	Rimov	871	246	551.027	1	M	NA	NA	NA	NA	NA	NA	NA	NA	NA	NA	NA	NA	NA	0.273	14.47	48.83
Rimov20090420_b	Rimov	867	200	395.387	2	M	NA	NA	NA	NA	NA	NA	NA	NA	NA	NA	NA	NA	NA	0.273	14.47	48.83
Rimov20090422_a	Rimov	708	199	376.778	2	M	NA	NA	NA	NA	NA	NA	NA	NA	NA	NA	NA	NA	NA	0.273	14.47	48.83
Rimov20090422_b	Rimov	997	216	511.577	1	M	NA	NA	NA	NA	NA	NA	NA	NA	NA	NA	NA	NA	NA	0.273	14.47	48.83
Rimov20090424_a	Rimov	826	197	398.281	2	M	NA	NA	NA	NA	NA	NA	NA	NA	NA	NA	NA	NA	NA	0.273	14.47	48.83
Rimov20090424_b	Rimov	704	180	323.857	1	M	NA	NA	NA	NA	NA	NA	NA	NA	NA	NA	NA	NA	NA	0.273	14.47	48.83
Rimov20090427_a	Rimov	640	154	277.24	1	M	NA	NA	NA	NA	NA	NA	NA	NA	NA	NA	NA	NA	NA	0.273	14.47	48.83
Rimov20090427_b	Rimov	773	194	335.03	2	M	NA	NA	NA	NA	NA	NA	NA	NA	NA	NA	NA	NA	NA	0.273	14.47	48.83
Rimov20090429_a	Rimov	1227	236	439.333	2	M	NA	NA	NA	NA	NA	NA	NA	NA	NA	NA	NA	NA	NA	0.273	14.47	48.83
Rimov20090429_b	Rimov	799	166	277.724	1	M	NA	NA	NA	NA	NA	NA	NA	NA	NA	NA	NA	NA	NA	0.273	14.47	48.83
Rimov20090501_a	Rimov	984	174	300.615	1	M	NA	NA	NA	NA	NA	NA	NA	NA	NA	NA	NA	NA	NA	0.273	14.47	48.83
Rimov20090501_b	Rimov	1406	231	435.216	2	M	NA	NA	NA	NA	NA	NA	NA	NA	NA	NA	NA	NA	NA	0.273	14.47	48.83
Rimov20090504_a	Rimov	629	166	277.7	2	M	NA	NA	NA	NA	NA	NA	NA	NA	NA	NA	NA	NA	NA	0.273	14.47	48.83
Rimov20090506_a	Rimov	504	113	207	1	M	NA	NA	NA	NA	NA	NA	NA	NA	NA	NA	NA	NA	NA	0.273	14.47	48.83
Rimov20090506_b	Rimov	753	179	292.588	2	M	NA	NA	NA	NA	NA	NA	NA	NA	NA	NA	NA	NA	NA	0.273	14.47	48.83
Rimov20090508_a	Rimov	398	94	219.75	1	M	NA	NA	NA	NA	NA	NA	NA	NA	NA	NA	NA	NA	NA	0.273	14.47	48.83
Rimov20090508_b	Rimov	392	131	238.714	2	M	NA	NA	NA	NA	NA	NA	NA	NA	NA	NA	NA	NA	NA	0.273	14.47	48.83
Rimov20090511_a	Rimov	554	179	288.579	2	M	NA	NA	NA	NA	NA	NA	NA	NA	NA	NA	NA	NA	NA	0.273	14.47	48.83
Rimov20090511_b	Rimov	299	89	143.474	1	M	NA	NA	NA	NA	NA	NA	NA	NA	NA	NA	NA	NA	NA	0.273	14.47	48.83
Rimov20090514_a	Rimov	574	156	245.364	2	M	NA	NA	NA	NA	NA	NA	NA	NA	NA	NA	NA	NA	NA	0.273	14.47	48.83
Rimov20090514_b	Rimov	959	149	274.556	1	M	NA	NA	NA	NA	NA	NA	NA	NA	NA	NA	NA	NA	NA	0.273	14.47	48.83
Rimov20090518_a	Rimov	346	101	157	1	M	NA	NA	NA	NA	NA	NA	NA	NA	NA	NA	NA	NA	NA	0.273	14.47	48.83
Rimov20090518_b	Rimov	382	151	309.037	2	M	NA	NA	NA	NA	NA	NA	NA	NA	NA	NA	NA	NA	NA	0.273	14.47	48.83
Rimov20090522_a	Rimov	695	129	196.103	1	M	NA	NA	NA	NA	NA	NA	NA	NA	NA	NA	NA	NA	NA	0.273	14.47	48.83
Rimov20090522_b	Rimov	386	117	202.913	2	M	NA	NA	NA	NA	NA	NA	NA	NA	NA	NA	NA	NA	NA	0.273	14.47	48.83
Rimov20090529_a	Rimov	386	98	237	1	M	NA	NA	NA	NA	NA	NA	NA	NA	NA	NA	NA	NA	NA	0.273	14.47	48.83
Rimov20090529_b	Rimov	358	81	129.882	2	M	NA	NA	NA	NA	NA	NA	NA	NA	NA	NA	NA	NA	NA	0.273	14.47	49.83
Rook0.3	Rookery Lake	9883	185	329.25	2.5	ant	8	NA	11	NA	NA	NA	NA	NA	NA	NA	NA	NA	NA	NA	78.07	-68.5
Uw7	Ryssjon	3251	708	743.59	2.5	e	20	NA	NA	NA	NA	148.909	NA	NA	1888.04	7.25726	NA	21.2194	7.01758	0.394521	17.1667	59.8167
Shi0.1	Lake Shield	18177	197	448.75	2.5	ant	4	NA	NA	NA	16	NA	NA	NA	1500	NA	NA	417	NA	NA	78.26	-68.5
Uw1	Siggeforasjon	15094	2877	3751.36	3	H	18.4	NA	9.91	NA	NA	13.6072	NA	NA	727.981	1.71083	NA	20.4319	0.665978	0.493151	17.15	59.9667
SV	Skalsvattnet	27224	1029	1555.33	e	o	9.76667	NA	10.1767	NA	NA	3.7	30.2707	1.564	105.075	0.98617	NA	1.992	1.85743	5.88493	12.21	63.56
Uw6	Strandsjon	15610	1293	1734.13	2	M	20	NA	8.97	NA	NA	40.5648	NA	NA	909.855	4.3756	NA	20.6174	1.9675	0.493151	17.1667	59.8833
TS	Tannsjon	32832	1141	2679.16	e	o	12.15	NA	9.4625	NA	NA	6.18956	44.0216	7.69971	76.191	1.66816	NA	2.92	2.11971	0.0410959	12.69	63.44
vk_e_a	Valkea Kotinen	1563	266	573.366	0-3	H	8.4	5.6	8.1	NA	NA	NA	NA	NA	NA	5	18.1	13.4	NA	NA	25.0667	61.2333
vk_e_s	Valkea Kotinen	2194	310	978.059	0-3	H	8.1	5.4	8.4	NA	NA	NA	NA	NA	NA	4	9.7	14.5	NA	NA	25.0667	61.2333
vm_e_a	Valkea Mustajarvi	1939	325	769.143	0-5	H	11.7	6.55	9.2	0.071	NA	8	NA	NA	367	5.1	4.8	5.8	NA	NA	25.1167	61.2167
vm_e_s	Valkea Mustajarvi	1976	223	346	0-5	H	10.5	6.3	11	0.076	NA	7	NA	NA	458	3.4	3	NA	NA	NA	25.1167	61.2167
Uw14	Valloxen	3605	511	512.571	3	e	20.4	NA	7.66	NA	NA	37.484	NA	NA	1000.79	6.78784	NA	13.2564	2.82761	1.69863	17.8333	59.7167
VN	Vaster-Noren	30221	948	1874.05	e	o	12.4364	NA	9.36	NA	NA	4.0619	19.5621	4.09047	91.957	1.58492	NA	4.162	0.975948	0.345205	12.76	63.48
Vere4.1	Vereteno Lake	6967	149	263.067	2.5	ant	2.5	2	16	NA	NA	NA	NA	NA	NA	NA	NA	NA	NA	NA	78.41	-68.52
Watts0.1	Lake Watts	8358	326	907.838	2.5	ant	3	NA	NA	NA	NA	9	NA	NA	500	NA	NA	5.4	NA	NA	78.22	-68.6
Willi0.3	Lake Williams	9292	194	576.105	2.5	ant	5	NA	NA	NA	NA	NA	NA	NA	NA	NA	NA	NA	NA	NA	78.16	-68.48
Willi1.8.1	Lake Williams	8908	180	447.8	2.5	ant	11	NA	NA	NA	NA	NA	NA	NA	NA	NA	NA	NA	NA	NA	78.16	-68.48
Zurich20090318_a	Zurich	786	113	178.143	5	M	NA	NA	NA	NA	NA	NA	NA	NA	NA	NA	NA	NA	NA	1.205	8.75	47.22
Zurich20090323_a	Zurich	411	107	230	5.5	M	NA	NA	NA	NA	NA	NA	NA	NA	NA	NA	NA	NA	NA	1.205	8.75	47.22
Zurich20090323_b	Zurich	1003	165	312.75	12	M	NA	NA	NA	NA	NA	NA	NA	NA	NA	NA	NA	NA	NA	1.205	8.75	47.22
Zurich20090330_a	Zurich	2181	231	362.524	14	M	NA	NA	NA	NA	NA	NA	NA	NA	NA	NA	NA	NA	NA	1.205	8.75	47.22
Zurich20090330_b	Zurich	1566	225	472.103	4	M	NA	NA	NA	NA	NA	NA	NA	NA	NA	NA	NA	NA	NA	1.205	8.75	47.22
Zurich20090403_a	Zurich	1020	177	325.25	3.5	M	NA	NA	NA	NA	NA	NA	NA	NA	NA	NA	NA	NA	NA	1.205	8.75	47.22
Zurich20090403_b	Zurich	591	126	220.545	13	M	NA	NA	NA	NA	NA	NA	NA	NA	NA	NA	NA	NA	NA	1.205	8.75	47.22
Zurich20090407_a	Zurich	496	122	204.217	32	M	NA	NA	NA	NA	NA	NA	NA	NA	NA	NA	NA	NA	NA	1.205	8.75	47.22
Zurich20090407_b	Zurich	106	48	125.5	10.5	M	NA	NA	NA	NA	NA	NA	NA	NA	NA	NA	NA	NA	NA	1.205	8.75	47.22
Zurich20090409_a	Zurich	664	103	191.438	7	M	NA	NA	NA	NA	NA	NA	NA	NA	NA	NA	NA	NA	NA	1.205	8.75	47.22
Zurich20090409_b	Zurich	1198	116	239.214	2	M	NA	NA	NA	NA	NA	NA	NA	NA	NA	NA	NA	NA	NA	1.205	8.75	47.22
Zurich20090414_a	Zurich	764	141	337.353	3.5	M	NA	NA	NA	NA	NA	NA	NA	NA	NA	NA	NA	NA	NA	1.205	8.75	47.22
Zurich20090414_b	Zurich	566	107	193.125	8	M	NA	NA	NA	NA	NA	NA	NA	NA	NA	NA	NA	NA	NA	1.205	8.75	47.22
Zurich20090415_a	Zurich	802	132	228.917	8	M	NA	NA	NA	NA	NA	NA	NA	NA	NA	NA	NA	NA	NA	1.205	8.75	47.22
Zurich20090415_b	Zurich	853	141	249.476	4.5	M	NA	NA	NA	NA	NA	NA	NA	NA	NA	NA	NA	NA	NA	1.205	8.75	47.22
Zurich20090417_a	Zurich	433	110	238	3.5	M	NA	NA	NA	NA	NA	NA	NA	NA	NA	NA	NA	NA	NA	1.205	8.75	47.22
Zurich20090417_b	Zurich	345	103	173.292	10.5	M	NA	NA	NA	NA	NA	NA	NA	NA	NA	NA	NA	NA	NA	1.205	8.75	47.22
Zurich20090420_a	Zurich	388	84	134.4	6.5	M	NA	NA	NA	NA	NA	NA	NA	NA	NA	NA	NA	NA	NA	1.205	8.75	47.22
Zurich20090420_b	Zurich	1436	150	273.75	8.5	M	NA	NA	NA	NA	NA	NA	NA	NA	NA	NA	NA	NA	NA	1.205	8.75	47.22
Zurich20090422_a	Zurich	527	104	210.909	6.5	M	NA	NA	NA	NA	NA	NA	NA	NA	NA	NA	NA	NA	NA	1.205	8.75	47.22
Zurich20090422_b	Zurich	618	115	171.04	8.5	M	NA	NA	NA	NA	NA	NA	NA	NA	NA	NA	NA	NA	NA	1.205	8.75	47.22
Zurich20090424_a	Zurich	622	123	224.65	5	M	NA	NA	NA	NA	NA	NA	NA	NA	NA	NA	NA	NA	NA	1.205	8.75	47.22
Zurich20090424_b	Zurich	678	127	245.556	7	M	NA	NA	NA	NA	NA	NA	NA	NA	NA	NA	NA	NA	NA	1.205	8.75	47.22
Zurich20090428_a	Zurich	629	149	307.882	6.5	M	NA	NA	NA	NA	NA	NA	NA	NA	NA	NA	NA	NA	NA	1.205	8.75	47.22
Zurich20090428_b	Zurich	373	117	205.652	10	M	NA	NA	NA	NA	NA	NA	NA	NA	NA	NA	NA	NA	NA	1.205	8.75	47.22
Zurich20090428_c	Zurich	849	139	231.773	6.5	M	NA	NA	NA	NA	NA	NA	NA	NA	NA	NA	NA	NA	NA	1.205	8.75	47.22
Zurich20090430_a	Zurich	610	114	176.368	10	M	NA	NA	NA	NA	NA	NA	NA	NA	NA	NA	NA	NA	NA	1.205	8.75	47.22
Zurich20090430_b	Zurich	992	147	221.391	11.5	M	NA	NA	NA	NA	NA	NA	NA	NA	NA	NA	NA	NA	NA	1.205	8.75	47.22
Zurich20090504_a	Zurich	877	143	228.2	13	M	NA	NA	NA	NA	NA	NA	NA	NA	NA	NA	NA	NA	NA	1.205	8.75	47.22
Zurich20090504_b	Zurich	1053	176	281.786	6.5	M	NA	NA	NA	NA	NA	NA	NA	NA	NA	NA	NA	NA	NA	1.205	8.75	47.22
Zurich20090506_a	Zurich	1033	169	245.312	13	M	NA	NA	NA	NA	NA	NA	NA	NA	NA	NA	NA	NA	NA	1.205	8.75	47.22
Zurich20090506_b	Zurich	2416	235	411.848	12	M	NA	NA	NA	NA	NA	NA	NA	NA	NA	NA	NA	NA	NA	1.205	8.75	47.22
Zurich20090512_a	Zurich	899	167	303.222	14	M	NA	NA	NA	NA	NA	NA	NA	NA	NA	NA	NA	NA	NA	1.205	8.75	47.22
